# Supplementary material for: Single-nucleus RNA sequencing of the midbrain blood-brain barrier cells in schizophrenia reveals subtle transcriptional changes with overall preservation of cellular proportions and phenotypes
Source: Research Square preprint supplement (doi:10.21203/rs.3.rs-1780478/v1), 2022-06-23
Supplement: Supplementary file 10 [file 07f34c13d46a4b6e6e75a7e8.docx]

**Supplementary Table 7.** Correlations between differentially expressed genes in schizophrenia and case-related variables.

| **Gene** | **Age** | ***p* value** | **pH** | ***p* value** | **AP** | ***p* value** | **PMI** | ***p* value** | **RIN** | ***p* value** | **sex** | ***p* value** |
| --- | --- | --- | --- | --- | --- | --- | --- | --- | --- | --- | --- | --- |
| AC013470.2 | -0.02 | 0.93 | 0.08 | 0.7 | -0.09 | 0.75 | 0.16 | 0.4 | 0.39 | ***0.04** | 0.18 | 0.35 |
| DOCK9 | 0 | 0.99 | 0.02 | 0.92 | -0.02 | 0.94 | 0.17 | 0.38 | 0.49 | ***0.01** | 0.2 | 0.29 |
| EML6 | 0.24 | 0.21 | -0.31 | 0.1 | 0.11 | 0.68 | -0.08 | 0.7 | -0.25 | 0.18 | -0.41 | ***0.03** |
| FOXP2 | 0.05 | 0.8 | 0.16 | 0.4 | -0.15 | 0.58 | 0 | 1 | 0.1 | 0.6 | 0.1 | 0.6 |
| HNRNPA2B1 | 0 | 1 | 0.48 | ***0.01** | -0.13 | 0.65 | -0.03 | 0.88 | 0 | 0.98 | 0.3 | 0.11 |
| ITGA1 | 0.07 | 0.73 | -0.2 | 0.31 | 0.2 | 0.47 | 0.01 | 0.95 | 0.26 | 0.17 | 0.1 | 0.6 |
| KCND2 | 0.32 | 0.09 | 0.04 | 0.85 | -0.21 | 0.45 | -0.16 | 0.4 | -0.32 | 0.09 | -0.05 | 0.8 |
| LMNTD1 | 0.13 | 0.52 | -0.08 | 0.7 | -0.06 | 0.83 | 0.2 | 0.29 | 0.41 | ***0.03** | 0.44 | ***0.02** |
| LRBA | 0.23 | 0.24 | -0.13 | 0.51 | 0.18 | 0.51 | -0.11 | 0.57 | 0.01 | 0.95 | -0.05 | 0.81 |
| NEK10 | -0.16 | 0.41 | 0.27 | 0.16 | -0.08 | 0.79 | 0.32 | 0.09 | 0.2 | 0.31 | 0.21 | 0.26 |
| NRXN1 | 0.37 | 0.05 | -0.07 | 0.72 | -0.09 | 0.74 | -0.33 | 0.08 | -0.29 | 0.12 | -0.23 | 0.22 |
| PDE4D | 0.18 | 0.36 | -0.21 | 0.27 | -0.2 | 0.47 | 0.04 | 0.82 | 0.04 | 0.83 | 0.15 | 0.44 |
| RUNX1T1 | 0.31 | 0.1 | -0.09 | 0.65 | 0.05 | 0.87 | -0.2 | 0.3 | 0.09 | 0.66 | -0.15 | 0.44 |
| TXNIP | 0.05 | 0.78 | -0.28 | 0.13 | 0.13 | 0.64 | -0.23 | 0.24 | 0.27 | 0.16 | 0.01 | 0.97 |

Results of the correlation between the average expression in each sample of every identified differentially expressed genes in schizophrenia as compared to controls (indicated in S. Figure 2) and the different case-related variables. A Pearson or Spearman correlation was performed depending on whether the case-related variable was normally distributed or not. Significant correlations (*p* value < 0.05) are highlighted in bold.
