# Supplementary material for: Single-nucleus RNA sequencing of the midbrain blood-brain barrier cells in schizophrenia reveals subtle transcriptional changes with overall preservation of cellular proportions and phenotypes
Source: Research Square preprint supplement (doi:10.21203/rs.3.rs-1780478/v1), 2022-06-23
Supplement: Supplementary file 13 [file 78b7cc6c3ede2079189e2844.docx]

**Supplementary Table 1.** Information about the cases used in this study.

| **Code** | **Diagnose** | **Age of death** | **Sex** | **Cause of death** | **Age of onset** | **Lifetime AP (mg)** | **Cortical Inflammatory status** | **PMI** | **BrainPH** | **RIN** | **NeuN+ nuclei** | **DN nuclei** | **Seq. saturation** | **% Transcripts mapped to the genome** |
| --- | --- | --- | --- | --- | --- | --- | --- | --- | --- | --- | --- | --- | --- | --- |
| 1 | CN | 30-40 | 1 | CARDIAC | NA | NA | High | 22 | 6.48 | 5.6 | 5 000 | 40 000 | 70.2 | 58.7 |
| 2 | CN | 30-40 | 2 | CARDIAC | NA | NA | Normal | 24 | 6.87 | 7.9 | 1 775 | 40 000 | 41.3 | 62.2 |
| 3 | CN | 41-51 | 1 | CARDIAC | NA | NA | Normal | 29 | 6.94 | 6.7 | 5 000 | 40 000 | 65 | 55.5 |
| 4 | CN | 41-51 | 1 | CARDIAC | NA | NA | Normal | 21 | 6.81 | 6.6 | 5 000 | 40 000 | 56.4 | 48.7 |
| 5 | CN | 30-40 | 1 | MYOCARDITIS | NA | NA | Normal | 52 | 6.7 | 7.7 | 5 110 | 40 000 | 69.8 | 54.2 |
| 6 | CN | 52-62 | 1 | CARDIAC | NA | NA | Normal | 47 | 6.8 | 7.3 | 5 000 | 40 000 | 44.5 | 42.2 |
| 7 | CN | 30-40 | 2 | CARDIAC | NA | NA | Normal | 28 | 6.7 | 7.5 | 5 000 | 40 000 | 71.3 | 53.4 |
| 8 | CN | 30-40 | 2 | CARDIAC | NA | NA | Normal | 33 | 6 | 7.7 | 8 000 | 39 000 | 66 | 53.1 |
| 9 | CN | 52-62 | 1 | CARDIAC | NA | NA | Normal | 28 | 6 | 7.1 | 3 500 | 40 000 | 67.7 | 36.1 |
| 10 | CN | 41-51 | 1 | CARDIAC | NA | NA | Normal | 31 | 6.7 | 8.6 | 5 000 | 40 000 | 38.6 | 40.9 |
| 11 | CN | 30-40 | 1 | CARDIAC | NA | NA | Normal | 13 | 6.5 | 4.1 | 5 000 | 40 000 | 35 | 38.6 |
| 12 | CN | 52-62 | 1 | CARDIAC | NA | NA | Normal | 9 | 6.4 | 8.6 | 9 490 | 40 000 | 45.2 | 30.4 |
| 13 | CN | 41-51 | 1 | CARDIAC | NA | NA | Normal | 46 | 6.5 | 8.5 | 10 000 | 40 000 | 42.5 | 48.8 |
| 14 | CN | 41-51 | 2 | CARDIAC | NA | NA | Normal | 28 | 6.59 | 7.4 | 10 000 | 40 000 | 41.8 | 42 |
| 15 | SZ | 41-51 | 1 | PNEUMONIA | 21 | 180 000 | High | 26 | 6.42 | 5.3 | 5 000 | 40 000 | 67.4 | 58.6 |
| 16 | SZ | 41-51 | 2 | SUIC:JUMPED | 34 | 20 000 | High | 52 | 6.51 | 8.9 | 10 000 | 40 000 | 76.1 | 75 |
| 17 | SZ | 30-40 | 1 | CARDIAC | 19 | 20 000 | High | 29 | 6.5 | 7.5 | 5 000 | 40 000 | 62.8 | 59.4 |
| 18 | SZ | 30-40 | 1 | MVA | 17 | 120 000 | High | 80 | 6.6 | 6.9 | 5 000 | 41 600 | 37.2 | 35.7 |
| 19 | SZ | 30-40 | 1 | CARDIAC | 13 | 20 000 | Normal | 30 | 6.8 | 8.1 | 5 000 | 40 000 | 61.7 | 54.4 |
| 20 | SZ | 41-51 | 1 | CIRRHOSIS | 18 | 90 000 | Normal | 18 | 6.3 | 6.9 | 10 000 | 38 000 | 59.6 | 56.1 |
| 21 | SZ | 19-29 | 1 | OD | 18 | 2 500 | Normal | 28 | 6.73 | 8.4 | 10 000 | 35 000 | 64.7 | 60.5 |
| 22 | SZ | 41-51 | 1 | CARDIAC | 31 | 34 000 | Normal | 9 | 6.2 | 5.1 | 5 000 | 40 000 | 59.5 | 41.5 |
| 23 | SZ | 19-29 | 1 | SUIC:OD | 20 | 12 000 | Normal | 15 | 6.2 | 8.5 | 5 000 | 40 000 | 67.8 | 51 |
| 24 | SZ | 52-62 | 1 | CARDIAC | 28 | 100 000 | Normal | 10 | 6.1 | 7.7 | 2 570 | 42 560 | 58 | 35.2 |
| 25 | SZ | 52-62 | 2 | CARDIAC | 29 | 15 000 | Normal | 13 | 6.49 | 8.9 | 10 000 | 35 000 | 56.1 | 55.2 |
| 26 | SZ | 41-51 | 1 | CARDIAC | 23 | 130 000 | Normal | 43 | 6.63 | 7.5 | 10 000 | 40 000 | 45.1 | 54.7 |
| 27 | SZ | 30-40 | 1 | PNEUMONIA | 21 | 75 000 | Normal | 34 | 6.18 | 8.8 | 9 040 | 40 000 | 77.4 | 56.8 |
| 28 | SZ | 30-40 | 1 | CARDIAC | 22 | 35 000 | Normal | 33 | 6.2 | 8.1 | 5 000 | 40 000 | 44.9 | 32.5 |
| 29 | SZ | 41-51 | 1 | EXHAUSTIVE MANIA/NMS | 19 | 350 000 | Normal | 9 | 5.9 | 7.2 | 10 430 | 28 530 | 66.7 | 35.1 |

Information about the cases and some quality measurements of the midbrain samples obtained from them. Schizophrenia (SZ), Control (CN), Antipsychotics (AP), Post Mortem Interval (PMI), Double Negative (DN), Sequencing (Seq), Over Dose (OD). Lifetime AP: fluphenazine equivalents. The cortical inflammatory status of the donor was previously defined in [1].

**Supplementary Table 2.** Comparisons of demographics between schizophrenia and control groups.

| **Variable** | **Normality** | **Hom_var** | **Test** | ***p* value** |
| --- | --- | --- | --- | --- |
| Age | TRUE | TRUE | t-test | 0.27 |
| PMI | FALSE | TRUE | Man-Whitney U | 0.73 |
| BrainPH | TRUE | TRUE | t-test | 0.08 |
| RIN | FALSE | TRUE | Man-Whitney U | 0.38 |
| Sex | NA | NA | Fisher exact | 0.39 |

Results of comparing the demographics and case-related variables between schizophrenia and control groups. Homoscedasticity of the variance (Hom_var).

References

1. Fillman, S.G., D. Sinclair, S.J. Fung*, et al.*, *Markers of inflammation and stress distinguish subsets of individuals with schizophrenia and bipolar disorder.* Translational psychiatry, 2014. **4**(2): p. e365-e365.
